# Supplementary material
Source: MDPI journal article supplement (https://www.mdpi.com/1424-8247/14/12/1212)
Supplement: s1 [file s1]

**Table S1. SUVmax of tumor lesions on the baseline [<sup>68</sup>Ga]Ga-DOTA.SA.FAPi PET/CT in the [<sup>177</sup>Lu]Lu-DOTA.SA.FAPi group.**

| Patient S.No                   | Cancer type         | Site of lesion                 | SUVmax                     | Tumor-to-pancreas ratio    |
|--------------------------------|---------------------|--------------------------------|----------------------------|----------------------------|
| 1.                             | Right breast cancer | Right breast primary tumor     | 12.5                       | 4.8                        |
|                                |                     | Right shoulder skeletal lesion | 8.7                        | 3.3                        |
| 2.                             | B/L breast cancer   | Right shoulder skeletal lesion | 7.8                        | 3.9                        |
|                                |                     | Left shoulder skeletal lesion  | 8.8                        | 4.4                        |
|                                |                     | Left knee skeletal lesion      | 6.7                        | 3.4                        |
| 3.                             | Right breast cancer | Ileum                          | 8.1                        | 4                          |
|                                |                     | Pubis                          | 9.0                        | 4.5                        |
| <b>Total number of lesions</b> |                     | <b>7</b>                       |                            |                            |
| <b>Mean±SD (Range)</b>         |                     |                                | <b>8.1 ± 0.8 (6.7 – 9)</b> | <b>4 ± 0.5 (3.3 – 4.8)</b> |

\*As pancreas demonstrated highest FAPi expression on [<sup>68</sup>Ga]Ga-DOTA.SA.FAPi PET/CT tumor-to-pancreas ratio was considered.

**Table S2. SUVmax of tumor lesions on the baseline [<sup>68</sup>Ga]Ga-DOTA.SA.FAPi PET/CT in the [<sup>177</sup>Lu]Lu-DOTAGA.(SA.FAPi)<sub>2</sub> group**

| Patient S.No                   | Cancer type                                      | Site of lesion              | SUVmax                         | Tumor-to-pancreas ratio      |
|--------------------------------|--------------------------------------------------|-----------------------------|--------------------------------|------------------------------|
| 1                              | Radioiodine refractory follicular thyroid cancer | Right ileum skeletal lesion | 10                             | 3.8                          |
|                                |                                                  | Femur bone lesion           | 12.8                           | 6                            |
| 2                              | Triple negative breast cancer                    | Right lung mass             | 11.1                           | 4.6                          |
| 3                              | Radioiodine refractory papillary thyroid cancer  | Right lung nodule           | 14.2                           | 6.7                          |
| 4                              | Radioiodine refractory papillary thyroid cancer  | Left shoulder bone lesion   | 9.21                           | 4.6                          |
|                                |                                                  | Sternum                     | 8.9                            | 4.2                          |
|                                |                                                  | Right head of femur lesion  | 7.6                            | 3.8                          |
| 5                              | Paraganglioma                                    | Skull                       | 12                             | 4.6                          |
|                                |                                                  | Anterior rib lesion         | 8.7                            | 3.3                          |
|                                |                                                  | Posterior rib lesion        | 7.2                            | 2.7                          |
| 6                              | Anaplastic thyroid cancer                        | Right Neck mass             | 9.8                            | 3.6                          |
| 7                              | Medullary thyroid cancer                         | Liver lesion                | 11.8                           | 4.0                          |
| <b>Total number of lesions</b> |                                                  | <b>N =12</b>                |                                |                              |
| <b>Mean ± SD (Range)</b>       |                                                  |                             | <b>10.2 ± 2.1 (7.2 – 14.2)</b> | <b>4.3 ± 1.1 (2.7 – 6.7)</b> |
